# Supplementary material for: Three distinct mechanisms predominate in non-contact anterior cruciate ligament injuries in male professional football players: a systematic video analysis of 39 cases
Source: HighWire-hosted journal article supplement (doi:10.1136/bjsports-2014-094573), 2015-04-23
Supplement: bjsports-2014-094573supp_table.pdf [file bjsports-2014-094573supp_table.pdf]

**Supplementary table 1** Football-specific variables recorded for 39 ACL injury cases analysed using systematic video analysis

| Case            | Playing situation | Field location  | Player action      | Duel type               | Player contact preceding injury | Player contact at injury |
|-----------------|-------------------|-----------------|--------------------|-------------------------|---------------------------------|--------------------------|
| <b>Pressing</b> |                   |                 |                    |                         |                                 |                          |
| #3              | Defense           | Midfield zone 2 | No ball possession | Pressing                | No                              | No                       |
| #9              | Defense           | Midfield zone 1 | No ball possession | Pressing                | No                              | Indirect, to trunk/arm   |
| #11             | Defense           | Midfield zone 1 | No ball possession | Pressing                | No                              | No                       |
| #13             | Defense           | Midfield zone 2 | No ball possession | Pressing                | No                              | No                       |
| #17             | Defense           | Defensive third | No ball possession | Pressing                | No                              | No                       |
| #25             | Defense           | Midfield zone 2 | No ball possession | Pressing                | No                              | No                       |
| #26             | Defense           | Defensive third | No ball possession | Pressing                | No                              | No                       |
| #28             | Defense           | Offensive third | No ball possession | Pressing                | No                              | No                       |
| #32             | Defense           | Offensive third | No ball possession | Pressing                | No                              | No                       |
| #37             | Defense           | Midfield zone 1 | No ball possession | Pressing                | No                              | No                       |
| #40             | Defense           | Midfield zone 2 | No ball possession | Pressing                | No                              | No                       |
| <b>Kicking</b>  |                   |                 |                    |                         |                                 |                          |
| #2              | Offense           | Offensive third | Passing            | No duel                 | No                              | No                       |
| #15             | Defense           | Midfield zone 1 | Clearing           | Other (clash of legs)   | Yes, to injured leg             | Yes, to trunk/arm        |
| #30             | Offense           | Offensive third | Shooting           | Tackled by other player | Yes, to uninjured leg           | No                       |
| #38             | Defense           | Midfield zone 1 | Clearing           | No duel                 | No                              | No                       |
| #39             | Defense           | Defensive third | Clearing           | Tackled by other player | Yes, to trunk/arm               | Yes, to trunk/arm        |
| <b>Heading</b>  |                   |                 |                    |                         |                                 |                          |
| #10             | Defense           | Midfield zone 1 | Heading            | Heading duel            | Yes, to trunk/arm               | No                       |
| #14             | Defense           | Defensive third | Heading            | No duel                 | No                              | No                       |

|              |         |                 |                     |                         |                                   |                                |
|--------------|---------|-----------------|---------------------|-------------------------|-----------------------------------|--------------------------------|
| #18          | Defense | Defensive third | Heading             | No duel                 | No                                | No                             |
| #27          | Defense | Midfield zone 1 | Heading             | Heading duel            | Yes, to trunk/arm                 | No                             |
| #35          | Offense | Offensive third | Heading             | No duel                 | No                                | No                             |
| <b>Other</b> |         |                 |                     |                         |                                   |                                |
| #1           | Offense | Midfield zone 2 | Screening           | Tackled by other player | No                                | Yes, to injured knee           |
| #4           | Defense | Defensive third | No ball possession  | Running                 | Yes, to trunk/arm                 | Yes, to trunk/arm              |
| #5           | Defense | Defensive third | Screening           | Screening               | Yes, to trunk/arm                 | Yes, to trunk/arm              |
| #6           | Defense | Defensive third | No ball possession  | Running                 | Yes, to trunk/arm                 | Yes, to trunk/arm              |
| #7           | Defense | Offensive third | No ball possession  | No duel                 | Yes, to injured leg               | No                             |
| #8           | Offense | Offensive third | Receiving           | No duel                 | No                                | No                             |
| #12          | Defense | Defensive third | No ball possession  | No duel                 | No                                | No                             |
| #16          | Offense | Midfield zone 2 | Screening           | Tackled by other player | Yes, to trunk/arm                 | Yes, to injured knee           |
| #19          | Defense | Defensive third | Turning             | Tackled by other player | Yes, to trunk/arm                 | Yes, to injured knee           |
| #20          | Defense | Defensive third | No ball possession  | Running                 | No                                | No                             |
| #21          | Offense | Offensive third | Dribbling           | Tackled by other player | Yes, to uninjured leg             | No                             |
| #22          | Defense | Defensive third | Other (goalkeeping) | Collision               | No                                | Yes, to injured leg (not knee) |
| #23          | Offense | Midfield zone 2 | Receiving           | No duel                 | No                                | No                             |
| #24          | Defense | Defensive third | No ball possession  | Collision               | Yes, to trunk/arm                 | Yes, to injured knee           |
| #29          | Defense | Midfield zone 1 | Passing             | Collision               | No                                | Yes, to injured knee           |
| #33          | Defense | Midfield zone 2 | No ball possession  | Collision               | Yes, to trunk/arm and injured leg | Yes, to trunk/arm              |
| #34          | Defense | Defensive third | No ball possession  | Running                 | Yes, to trunk/arm                 | Yes, to trunk/arm              |
| #36          | Offense | Midfield zone 2 | No ball possession  | No duel                 | No                                | No                             |

ACL, anterior cruciate ligament.

**Supplementary table 2** Biomechanical variables recorded for 33 non-contact and indirect contact ACL injury cases analysed using systematic video analysis

| Case            | In balance | Movement | Cutting angle | Leg loading                  | Horizontal speed at IC | Vertical speed at IC | Trunk rotation at IF | Foot rotation at IC | Foot strike |
|-----------------|------------|----------|---------------|------------------------------|------------------------|----------------------|----------------------|---------------------|-------------|
| <b>Pressing</b> |            |          |               |                              |                        |                      |                      |                     |             |
| #3              | Yes        | Forward  | 30-90°        | One leg                      | High                   | Zero                 | Neutral              | External            | Heel        |
| #9              | Yes        | Forward  | 30-90°        | One leg                      | High                   | Zero                 | Toward uninjured leg | Neutral             | Heel        |
| #11             | Yes        | Forward  | 30-90°        | One leg                      | Low                    | Zero                 | Unsure               | Unsure              | Unsure      |
| #13             | Yes        | Forward  | 30-90°        | One leg                      | High                   | Zero                 | Neutral              | Neutral             | Unsure      |
| #17             | Yes        | Sideways | 30-90°        | One leg                      | Low                    | Zero                 | Neutral              | Internal >45°       | Toe         |
| #25             | Yes        | Forward  | Stopping/>90° | One leg                      | High                   | Zero                 | Toward uninjured leg | Neutral             | Heel        |
| #26             | No         | Forward  | 30-90°        | One leg                      | High                   | Zero                 | Toward uninjured leg | External            | Heel        |
| #28             | Yes        | Forward  | 30-90°        | One leg                      | High                   | Zero                 | Toward uninjured leg | Neutral             | Flat        |
| #32             | Yes        | Forward  | 30-90°        | One leg                      | Low                    | Zero                 | Toward uninjured leg | Neutral             | Heel        |
| #37             | Yes        | Forward  | 30-90°        | One leg                      | High                   | Zero                 | Neutral              | Neutral             | Heel        |
| #40             | No         | Forward  | 0-30°         | One leg                      | High                   | Zero                 | Toward uninjured leg | External            | Heel        |
| <b>Kicking</b>  |            |          |               |                              |                        |                      |                      |                     |             |
| #2              | No         | Sideways | Stopping/>90° | One leg                      | High                   | Zero                 | Neutral              | Internal >45°       | Unsure      |
| #15             | No         | Backward | N/A           | One leg                      | Low                    | Zero                 | Neutral              | N/A                 | Toe         |
| #30             | No         | Backward | N/A           | One leg                      | Low                    | Zero                 | N/A                  | N/A                 | Toe         |
| #38             | No         | Sideways | N/A           | One leg                      | Low                    | Zero                 | Toward uninjured leg | Internal >45°       | Toe         |
| #39             | No         | Forward  | Stopping/>90° | Two legs, mainly injured leg | Low                    | Zero                 | Toward uninjured leg | Neutral             | Flat        |
| <b>Heading</b>  |            |          |               |                              |                        |                      |                      |                     |             |
| #10             | No         | Downward | N/A           | One leg                      | Zero                   | High                 | Neutral              | N/A                 | Toe         |
| #14             | Yes        | Backward | N/A           | One leg                      | Low                    | Low                  | Toward uninjured leg | N/A                 | Toe         |

|              |        |           |               |                              |      |      |                      |                |        |
|--------------|--------|-----------|---------------|------------------------------|------|------|----------------------|----------------|--------|
| #18          | Yes    | Sideways  | Stopping/>90° | Two legs, mainly injured leg | Low  | Low  | Neutral              | Internal >45°  | Flat   |
| #27          | No     | Downward  | Stopping/>90° | One leg                      | Zero | High | Toward uninjured leg | Neutral        | Toe    |
| #35          | No     | Forward   | 30-90°        | One leg                      | Low  | High | Neutral              | Neutral        | Toe    |
| <b>Other</b> |        |           |               |                              |      |      |                      |                |        |
| #4           | Unsure | Forward   | 0-30°         | Unsure                       | High | Zero | Unsure               | Unsure         | Unsure |
| #5           | Yes    | Forward   | Stopping/>90° | Two legs, mainly injured leg | Low  | Zero | Neutral              | Neutral        | Flat   |
| #6           | Unsure | Forward   | 30-90°        | One leg                      | High | Zero | Toward uninjured leg | External       | Heel   |
| #7           | No     | Forward   | Stopping/>90° | One leg                      | High | Zero | Toward uninjured leg | Internal 0-45° | Heel   |
| #8           | Yes    | Sideways  | Stopping/>90° | One leg                      | Low  | Zero | Toward uninjured leg | Internal >45°  | Flat   |
| #12          | No     | Sideways  | Stopping/>90° | Two legs, mainly injured leg | Low  | Zero | Toward uninjured leg | Internal >45°  | Flat   |
| #20          | No     | Forward   | Stopping/>90° | One leg                      | High | Zero | Toward uninjured leg | Unsure         | Unsure |
| #21          | No     | Combined* | 30-90°        | One leg                      | High | Zero | Neutral              | Neutral        | Flat   |
| #23          | Yes    | Sideways  | 30-90°        | One leg                      | Low  | Low  | Toward injured leg   | External       | Toe    |
| #33          | No     | Forward   | 0-30°         | Two legs, mainly injured leg | High | Zero | Toward uninjured leg | Unsure         | Unsure |
| #34          | No     | Forward   | 0-30°         | One leg                      | High | Zero | Toward injured leg   | Neutral        | Heel   |
| #36          | Yes    | Forward   | Stopping/>90° | One leg                      | High | Zero | Neutral              | Internal 0-45° | Heel   |

ACL, anterior cruciate ligament; IC, initial contact; IF, index frame.

\*Combined forward and sideways.

**Supplementary table 3** Joint flexion angles of the hip, knee and ankle joints for the main non-contact and indirect contact ACL injury mechanisms

| Case             | Hip flexion angle (°)* |            |          |          | Knee flexion angle (°)* |           |          |          | Ankle flexion angle (°)* |          |           |           |
|------------------|------------------------|------------|----------|----------|-------------------------|-----------|----------|----------|--------------------------|----------|-----------|-----------|
|                  | IC                     | IC+40 ms   | IC+80 ms | IF       | IC                      | IC+40 ms  | IC+80 ms | IF       | IC                       | IC+40 ms | IC+80 ms  | IF        |
| <b>Pressing†</b> |                        |            |          |          |                         |           |          |          |                          |          |           |           |
| #3               | 25 (±13)               | 35 (±15)   | 35 (±14) | 35 (±14) | 10 (±0)                 | 27.5 (±6) | 45 (±6)  | 45 (±6)  | 0 (±4)                   | Unsure   | Unsure    | Unsure    |
| #9               | Unsure                 | Unsure     | Unsure   | Unsure   | Unsure                  | Unsure    | Unsure   | Unsure   | Unsure                   | Unsure   | Unsure    | Unsure    |
| #13              | 10 (±9)                | 15 (±10)   | 40 (±12) | 40 (±12) | 0 (±3)                  | 30 (±10)  | 55 (±9)  | 55 (±9)  | 10 (±8)                  | 10 (±7)  | -10 (±11) | -10 (±11) |
| #17              | 40 (±5)                | 30 (±5)    | 40 (±7)  | 30 (±3)  | 20 (±4)                 | 25 (±1)   | 35 (±3)  | 30 (±5)  | 30 (±8)                  | 0 (±4)   | -5 (±6)   | -5 (±4)   |
| #25              | 10 (±8)                | 20 (±5)    | 40 (±3)  | 20 (±5)  | 5 (±3)                  | 30 (±4)   | 60 (±8)  | 30 (±4)  | Unsure                   | 5 (±3)   | -5 (±3)   | 5 (±3)    |
| #26              | 20 (±7)                | 30 (±8)    | 35 (±6)  | 35 (±6)  | 10 (±4)                 | 10 (±8)   | 20 (±7)  | 20 (±7)  | 10 (±8)                  | 20 (±10) | 10 (±8)   | 10 (±9)   |
| #28              | 30 (±11)               | 30 (±9)    | 30 (±7)  | 30 (±7)  | 5 (±4)                  | 10 (±3)   | 20 (±6)  | 30 (±8)  | 10 (±2)                  | 5 (±5)   | 0 (±4)    | -5 (±2)   |
| #32              | 20 (±5)                | 20 (±4)    | 20 (±6)  | 20 (±6)  | 5 (±3)                  | 20 (±4)   | 30 (±5)  | 25 (±5)  | -10 (±4)                 | 10 (±3)  | -5 (±2)   | 0 (±2)    |
| #37              | 25 (±7)                | 35 (±9)    | 30 (±6)  | 30 (±8)  | 10 (±2)                 | 30 (±7)   | 40 (±11) | 35 (±10) | 15 (±7)                  | 0 (±1)   | -5 (±5)   | -5 (±4)   |
| #40              | 30 (±9)                | 30 (±3)    | 30 (±6)  | 30 (±3)  | 5 (±7)                  | 20 (±7)   | 40 (±6)  | 20 (±7)  | 0 (±5)                   | 15 (±5)  | 10 (±2)   | 15 (±5)   |
| <b>Kicking</b>   |                        |            |          |          |                         |           |          |          |                          |          |           |           |
| #2               | 15 (±6)                | 10 (±3)    | Unsure   | Unsure   | 10 (±5)                 | Unsure    | Unsure   | Unsure   | Unsure                   | Unsure   | Unsure    | Unsure    |
| #15              | 25 (±10)               | 22.5 (±10) | 30 (±8)  | 30 (±8)  | 15 (±4)                 | 25 (±9)   | 35 (±12) | 30 (±11) | 10 (±1)                  | 0 (±3)   | 0 (±7)    | 0 (±6)    |
| #30              | 10 (±6)                | 15 (±5)    | 20 (±5)  | 20 (±5)  | 10 (±8)                 | 15 (±7)   | 20 (±6)  | 15 (±7)  | 20 (±5)                  | 0 (±4)   | 5 (±6)    | 5 (±4)    |
| #38              | 5 (±5)                 | 20 (±5)    | 30 (±8)  | 20 (±5)  | 15 (±3)                 | 30 (±6)   | 45 (±5)  | 30 (±6)  | 15 (±3)                  | 10 (±3)  | 5 (±6)    | 10 (±5)   |

|                  |                |                |                |                |                |                  |                 |                |                |                 |                 |                 |
|------------------|----------------|----------------|----------------|----------------|----------------|------------------|-----------------|----------------|----------------|-----------------|-----------------|-----------------|
| #39              | 10 ( $\pm 6$ ) | 30 ( $\pm 9$ ) | 40 ( $\pm 7$ ) | 20 ( $\pm 6$ ) | 10 ( $\pm 8$ ) | 35 ( $\pm 6$ )   | 50 ( $\pm 11$ ) | 25 ( $\pm 7$ ) | 10 ( $\pm 2$ ) | -5 ( $\pm 2$ )  | -5 ( $\pm 3$ )  | 0 ( $\pm 2$ )   |
| <b>Heading‡:</b> |                |                |                |                |                |                  |                 |                |                |                 |                 |                 |
| #10              | 5 ( $\pm 8$ )  | Unsure         | Unsure         | Unsure         | 0 ( $\pm 1$ )  | Unsure           | Unsure          | Unsure         | Unsure         | Unsure          | Unsure          | Unsure          |
| #18              | 40 ( $\pm 4$ ) | 45 ( $\pm 2$ ) | 45 ( $\pm 4$ ) | 45 ( $\pm 3$ ) | 5 ( $\pm 2$ )  | 45 ( $\pm 10$ )  | 55 ( $\pm 7$ )  | 50 ( $\pm 9$ ) | 0 ( $\pm 4$ )  | -15 ( $\pm 3$ ) | -15 ( $\pm 5$ ) | -15 ( $\pm 3$ ) |
| #27              | 15 ( $\pm 4$ ) | 20 ( $\pm 5$ ) | 30 ( $\pm 3$ ) | 25 ( $\pm 4$ ) | 5 ( $\pm 4$ )  | 20 ( $\pm 5$ )   | 30 ( $\pm 11$ ) | 25 ( $\pm 7$ ) | 30 ( $\pm 4$ ) | 0 ( $\pm 4$ )   | 0 ( $\pm 9$ )   | 0 ( $\pm 6$ )   |
| #35              | 0 ( $\pm 3$ )  | 10 ( $\pm 3$ ) | 15 ( $\pm 6$ ) | 15 ( $\pm 6$ ) | 10 ( $\pm 1$ ) | 17.5 ( $\pm 4$ ) | 30 ( $\pm 4$ )  | 30 ( $\pm 4$ ) | 30 ( $\pm 4$ ) | 0 ( $\pm 3$ )   | -10 ( $\pm 3$ ) | -10 ( $\pm 3$ ) |

---

ACL, anterior cruciate ligament; IC, initial contact; IF, index frame.

\*Flexion angles are reported as the median of the individual estimates along with the mean absolute deviation from the median. Positive values mean flexion and negative values mean extension.

†Case #11 excluded.

‡Case #14 excluded.
